# Supplementary material
Source: PubMed Central journal article supplement (PMC10133321)
Supplement: 41431_2022_1252_MOESM1_ESM.pdf [file 41431_2022_1252_MOESM1_ESM.pdf]

**Supplementary Table S1:** Curation of patient variants using ACMG-based criteria via varsome.com

| Variant                             | Evidence                                                                                                                                                                                                                             | Strength criteria | Curation                     |
|-------------------------------------|--------------------------------------------------------------------------------------------------------------------------------------------------------------------------------------------------------------------------------------|-------------------|------------------------------|
| LARS2<br>c.1565C>A<br>p.(Thr522Asn) | Combined evidence from ClinVar, UniProt and the literature, all indicating this as a pathogenic variant associated with gonadal dysgenesis and auditory dysfunction                                                                  | PP5: Very Strong  | 1PVS+2PS+2PP<br>= pathogenic |
|                                     | The position is strongly conserved (phyloP100way = 7.54 is greater than 7.2)<br>GnomAD exomes homozygous allele count = 0 is less than 2 for AD/AR                                                                                   | PM2: Strong       |                              |
|                                     | Pathogenic computational verdict based on 10 pathogenic predictions from DANN, DEOGEN2, EIGEN, FATHMM-MKL, LIST-S2, M-CAP, MVP, MutationAssessor, MutationTaster and SIFT vs 2 benign predictions from BayesDel_addAF and PrimateAI. | PPS: Supporting   |                              |
|                                     | Cosegregation with disease in multiple affected family members in a gene known to cause the disease                                                                                                                                  | PP1: Supporting   |                              |
|                                     | Well-established in vitro or in vivo functional studies supportive of a damaging effect on the gene or gene product                                                                                                                  | PS3: Strong       |                              |
| LARS2<br>c.1670A>G<br>p.(Tyr557Cys) | The position is strongly conserved (phyloP100way = 8.9 is greater than 7.2).<br>GnomAD exomes homozygous allele count = 0 is less than 2                                                                                             | PM2: Strong       | 2PS+2PP =<br>pathogenic      |
|                                     | Pathogenic computational verdict based on 11 pathogenic predictions from BayesDel_addAF, DANN, DEOGEN2, EIGEN, FATHMM-MKL, LIST-S2, M-CAP, MVP, MutationAssessor, MutationTaster and SIFT vs 1 benign prediction from PrimateAI.     | PP3: Supporting   |                              |
|                                     | Cosegregation with disease in multiple affected family members in a gene known to cause the disease                                                                                                                                  | PP1: Supporting   |                              |
|                                     | *Well-established in vitro or in vivo functional studies supportive of a damaging effect on the gene or gene product                                                                                                                 | PS3: Strong       |                              |

\*This criterion was only applied after functional studies were performed and escalated the variant from “likely pathogenic” to “pathogenic”.
